# Supplementary material
Source: PubMed Central journal article supplement (PMC8451738)
Supplement: 41375_2021_1418_MOESM1_ESM.pdf [file 41375_2021_1418_MOESM1_ESM.pdf]

Supplementary table 1. Characteristics at vaccination

|                                                                                                                                                                                        |                          |
|----------------------------------------------------------------------------------------------------------------------------------------------------------------------------------------|--------------------------|
| Median age (range), years                                                                                                                                                              | 68 (24-89)               |
| Gender, female (%)                                                                                                                                                                     | 27 (40)                  |
| Median body mass index (range), kg/sm <sup>2</sup>                                                                                                                                     | 24.7 (17.5-41.5)         |
| Median lymphocyte count at baseline (range), / $\mu$ L                                                                                                                                 | 1100 (100-3800)          |
| Median neutrophils count at baseline (range), / $\mu$ L                                                                                                                                | 2900 (100-33200)         |
| Median number of therapy lines (range)                                                                                                                                                 | 1 (1-4)                  |
| Median months from diagnosis to 1 <sup>st</sup> vaccine dose (range)                                                                                                                   | 24 (1-156)               |
| Median months from the beginning of the last therapy to 1 <sup>st</sup> vaccine dose (range)                                                                                           | 8 (1-34)                 |
| Median months from the last anti-CD20 administration before vaccination to the 1 <sup>st</sup> vaccine dose (range)                                                                    | 1.8 (0.0-88.7) (*)       |
| <b>Diagnosis</b>                                                                                                                                                                       |                          |
| Diffuse large B-cell lymphoma, # (%)                                                                                                                                                   | 24 (35) (**)             |
| Follicular lymphoma, # (%)                                                                                                                                                             | 29 (43)                  |
| Mantle cell lymphoma, # (%)                                                                                                                                                            | 5 (7)                    |
| Marginal zone lymphoma, # (%)                                                                                                                                                          | 10 (15)                  |
| <b>Therapeutic status at 1<sup>st</sup> vaccine dose</b>                                                                                                                               |                          |
| Ongoing therapy, # (%)                                                                                                                                                                 | 42 (62)                  |
| Follow-up, # (%)                                                                                                                                                                       | 26 (38)                  |
| <i>Only considering the 26 follow-up patients</i>                                                                                                                                      |                          |
| • Categorization by time interval (last anti-CD20 administration-1 <sup>st</sup> vaccine dose) with cutoff at 3 months                                                                 |                          |
| -within 3 months, # (%); median time interval, months (range)                                                                                                                          | 10 (38); 2.0 (0.6-3.0)   |
| -beyond 3 months, # (%); median time interval, months (range)                                                                                                                          | 16 (62); 9.8 (3.6-35.3)  |
| • Categorization by time interval (last anti-CD20 administration-1 <sup>st</sup> vaccine dose) with cutoff at 6 months                                                                 |                          |
| -within 6 months, # (%); median time interval, months (range)                                                                                                                          | 16 (62); 2.9 (0.6-5.9)   |
| -beyond 6 months, # (%); median time interval, months (range)                                                                                                                          | 10 (38); 14.1 (8.1-35.3) |
| <b>Last therapy administered (***)</b>                                                                                                                                                 |                          |
| <i>Patients on active systemic treatment, #</i>                                                                                                                                        | 42                       |
| -Induction combo: R-CHOP/R-COMP/R-Chl/R-Benda/R-DHAOX/G-CHOP/R-GEMOX/R-PROVECIP                                                                                                        | 5/1/3/7/3/2/1/2          |
| -Phosphatidylinositol 3-kinase inhibitors: Zandelisib/Idelalisib                                                                                                                       | 2/1                      |
| -Alkylating agent: Temozolamide                                                                                                                                                        | 1                        |
| -Maintenance: G/R                                                                                                                                                                      | 4/10                     |
| <i>Patients on follow-up, #</i>                                                                                                                                                        | 26                       |
| -Post-R maintenance/post-autologous stem cell transplant/post-R-BAC/post-G-CHOP/post-R-Magrath/post-R-Benda/post-R-Chl/post-R-CHOP/post-R-COMP/post-R-CVP/post-R-DHAOX/post-R-miniCOMP | 5/3/1/1/1/2/2/6/1/2/1/1  |

(\*) Zero in the range means that the last anti-CD20 administration before vaccination was approximately simultaneous with the 1<sup>st</sup> vaccine dose

(\*\*) In one case the diagnosis was Burkitt Lymphoma

(\*\*\*) Therapy acronyms. R and R-: rituximab alone and in combo with chemotherapy; G and G-:

obinutuzumab alone and in combo with chemotherapy; BAC: bendamustine, cytosine arabinoside; BEAM

(conditioning regimen for autologous transplant): carmustine, etoposide, cytosine arabinoside, melphalan;

Benda: bendamustine; Chl: chlorambucil; CHOP: cyclophosphamide, doxorubicin, vincristine, prednisone;

COMP: cyclophosphamide, liposomal doxorubicin citrate complex, vincristine, prednisone; CVP:

cyclophosphamide, vincristine, prednisone; DHAOX: cytosine arabinoside, oxaliplatin, dexamethasone;

GEMOX: gemcitabine, oxaliplatin; Magrath: CODOX-M (cyclophosphamide, vincristine, doxorubicin,

methotrexate) / IVAC (ifosfamide, etoposide, cytosine arabinoside); PROVECIP: procarbazine, vinblastine,

cyclophosphamide, prednisone.

Supplementary table 2. Predictors of response to BNT162b2 at 5 weeks

| Variables                                                                                                                                                                                                                                                                                                                                                       | Univariate analysis                          |        | Multivariate analysis |        |
|-----------------------------------------------------------------------------------------------------------------------------------------------------------------------------------------------------------------------------------------------------------------------------------------------------------------------------------------------------------------|----------------------------------------------|--------|-----------------------|--------|
|                                                                                                                                                                                                                                                                                                                                                                 | Responders                                   | p      | Odds ratio (95%CI)    | p      |
| <u>Age</u><br><68 years (n=33)<br>>68 years (n=35)                                                                                                                                                                                                                                                                                                              | 10 (30.3%)<br>4 (11.4%)                      | 0.074  | 4.02 (0.59-27.42)     | 0.155  |
| <u>Gender</u><br>F (n=27)<br>M (n=41)                                                                                                                                                                                                                                                                                                                           | 5 (18.5%)<br>9 (22%)                         | 1      |                       |        |
| <u>Body mass index</u><br><24.7 sm <sup>2</sup> (n=34)<br>>24.7 sm <sup>2</sup> (n=34)                                                                                                                                                                                                                                                                          | 7 (20.6%)<br>7 (20.6%)                       | 1      |                       |        |
| <u>Lines of therapy</u><br>1 (n=47)<br>>1 (n=21)                                                                                                                                                                                                                                                                                                                | 11 (23.4%)<br>3 (14.3%)                      | 0.524  |                       |        |
| <u>Lymphocyte count at baseline</u><br><1100/μL (n=35)<br>≥1100/μL (n=33)                                                                                                                                                                                                                                                                                       | 6 (17.1%)<br>8 (24.2%)                       | 0.555  |                       |        |
| <u>Neutrophils count at baseline</u><br><2900/μL (n=33)<br>≥2900/μL (n=35)                                                                                                                                                                                                                                                                                      | 7 (21.2%)<br>7 (20%)                         | 1      |                       |        |
| <u>Time from diagnosis to vaccination</u><br><24 months (n=34)<br>≥24 months (n=34)                                                                                                                                                                                                                                                                             | 6 (17.6%)<br>8 (23.5%)                       | 0.765  |                       |        |
| <u>Time from the start of the last therapy to vaccination</u><br><8 months (n=34)<br>≥8 months (n=34)                                                                                                                                                                                                                                                           | 2 (5.9%)<br>12 (35.3%)                       | 0.006  |                       |        |
| <u>Time from the last rituximab or obinutuzumab administration to vaccination</u><br><1.8 months (n=34)<br>≥1.8 months (n=34)                                                                                                                                                                                                                                   | 1 (2.9%)<br>13 (38.2%)                       | 0.001  |                       |        |
| <u>Diagnosis</u><br>Diffuse large B-cell lymphoma (n=24)<br>Follicular lymphoma (n=29)<br>Mantle cell lymphoma (n=5)<br>Marginal zone lymphoma (n=10)                                                                                                                                                                                                           | 5 (20.8%)<br>6 (20.7%)<br>1 (20%)<br>2 (20%) | 1 (*)  |                       |        |
| <u>Therapeutic status at vaccination (categorization by ongoing treatment or follow-up)</u><br>Ongoing therapy (n=42)<br>Follow-up (n=26)                                                                                                                                                                                                                       | 2 (4.8%)<br>12 (46.2%)                       | <0.001 |                       |        |
| <u>Therapeutic status at vaccination (categorization by time interval between the last anti-CD20 administration and the 1<sup>st</sup> vaccine dose with cutoff at 3 months)</u><br>Ongoing therapy plus follow-up with last dose of anti-CD20 administered within 3 months (n=52)<br>Follow-up with last dose of anti-CD20 administered beyond 3 months (n=16) | 2 (3.8%)<br>12 (75.0%)                       | <0.001 | 80.71 (11.75-554.35)  | <0.001 |
| <u>Therapeutic status at vaccination (categorization by time interval between the last anti-CD20 administration and the 1<sup>st</sup> vaccine dose with cutoff at 6 months)</u><br>Ongoing therapy plus follow-up with last dose of anti-CD20 administered within 6 months (n=58)<br>Follow-up with last dose of anti-CD20 administered beyond 6 months (n=10) | 6 (10.3%)<br>8 (80%)                         | <0.001 |                       |        |
| <u>Therapeutic status at vaccination in follow-up patients only (categorization by time interval between the last anti-CD20 administration and the 1<sup>st</sup> vaccine dose with cutoff at 3 months)</u><br>Last dose of anti-CD20 administered within 3 months (n=10)<br>Last dose of anti-CD20 administered beyond 3 months (n=16)                         | 0 (0%)<br>12 (75.0%)                         | <0.001 |                       |        |
| <u>Therapeutic status at vaccination in follow-up patients only (categorization by time interval between the last anti-CD20 administration and the 1<sup>st</sup> vaccine dose with cutoff at 6 months)</u><br>Last dose of anti-CD20 administered within 6 months (n=16)<br>Last dose of anti-CD20 administered beyond 6 months (n=10)                         | 4 (25%)<br>8 (80%)                           | 0.014  |                       |        |

(\*) Pearson Chi Square

The odds ratio of significant variables for response to the vaccine was assessed. Multivariate analysis using a logistic regression model was planned in case of multiple variables significant for response at univariate analysis.

Supplementary figure 1. Standardized Wilcoxon statistic by time interval between the last dose of anti-CD20 monoclonal antibody and 1<sup>st</sup> vaccine dose (months). Supplementary figure 1 shows that 3 months are the best cutoff to separate responders versus non-responders based on the standardized Wilcoxon statistic.

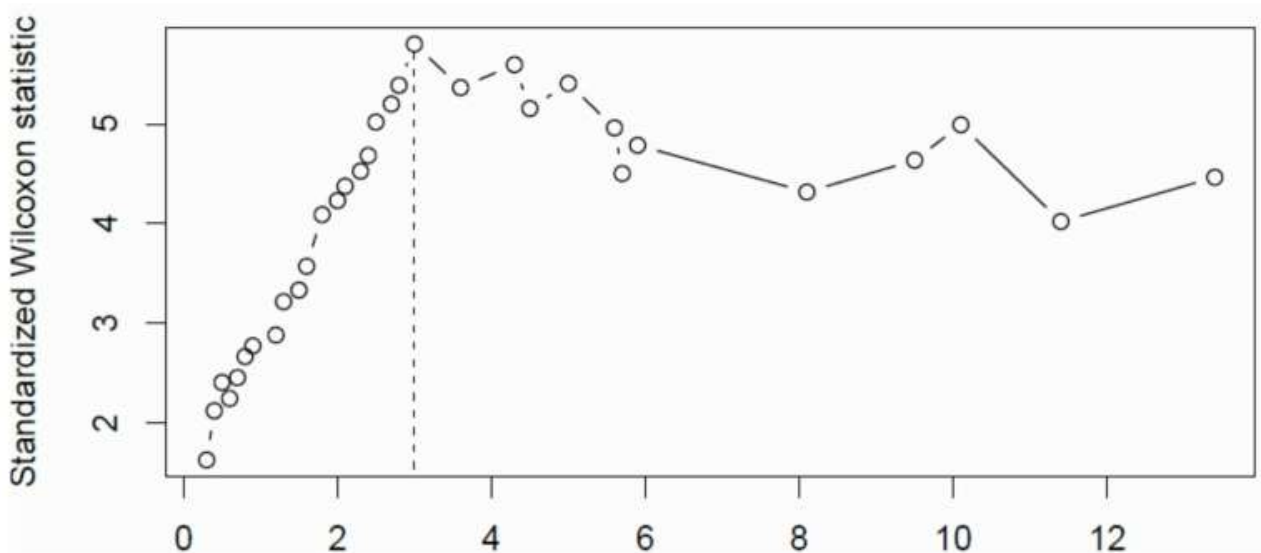

I.F.O.-COVID-19-TEAM

*Ilaria Cavallo<sup>1</sup>, Andrea Cazzani<sup>1</sup>, Ilaria Celesti<sup>1</sup>, Ludovica Ciuffreda<sup>1</sup>, Giovanna D'agosto<sup>1</sup>, Francesca De Nicola<sup>1</sup>, Martina Diano<sup>1</sup>, Sara Donzelli<sup>1</sup>, Antonio Federico<sup>1</sup>, Fulvia Fraticelli<sup>1</sup>, Lorenzo Furzi<sup>1</sup>, Frauke Inger Karen Goeman<sup>1</sup>, Alessia Lauretti<sup>1</sup>, Francesca Maione<sup>1</sup>, Alice Massacci<sup>1</sup>, Arianna Mastrofrancesco<sup>1</sup>, Carla Mottini<sup>1</sup>, Francisco Obregon<sup>1</sup>, Giulia Orlandi<sup>1</sup>, Matteo Pallocca<sup>1</sup>, Silvia Paluzzi<sup>1</sup>, Sara Petrolo<sup>1</sup>, Grazia Prignano<sup>1</sup>, Valentina Ricca<sup>1</sup>, Serena Salvo<sup>1</sup>, Eleonora Sperandio<sup>1</sup>, Elisabetta Trento<sup>1</sup>.*

<sup>1</sup> Istituti Fisioterapici Ospitalieri I.F.O. (IRCCS Regina Elena Cancer Institute and IRCCS San Gallicano Institute), Rome (Italy)
